# Supplementary material for: A Small-Molecule Inhibitor of MDMX Activates p53 and Induces Apoptosis
Source: Oxford University Press journal article supplement (doi:10.1158/1535-7163.mct-10-0581), 2010-11-13
Supplement: 15357163mct100581-sup-0581_sup_figs_1-7.pdf [file 15357163mct100581-sup-0581_sup_figs_1-7.pdf]

# Supplementary Materials

**Fig S1**

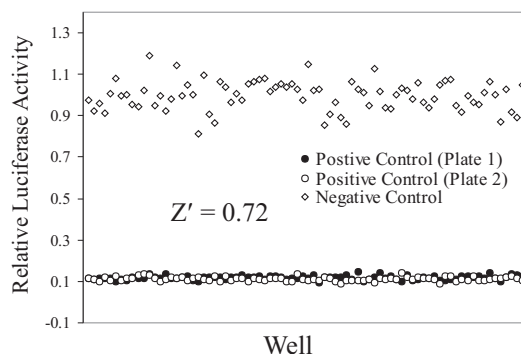

**Fig S1. The reporter assay based on the integrated *MDMX* promoter is highly reproducible and suitable for high-throughput drug screening.** Recombinant cells carrying the integrated *MDMX* promoter were plated into two 96-well plates, treated with 1  $\mu$ M of actinomycin D (positive control, 2 plates) or DMSO (negative control, 1 plate) for 6 h, and lysed for luciferase activity assays. The assay results from the two positive-control plates were combined and used to calculate  $Z'$  as described previously (34).

**Fig S2**

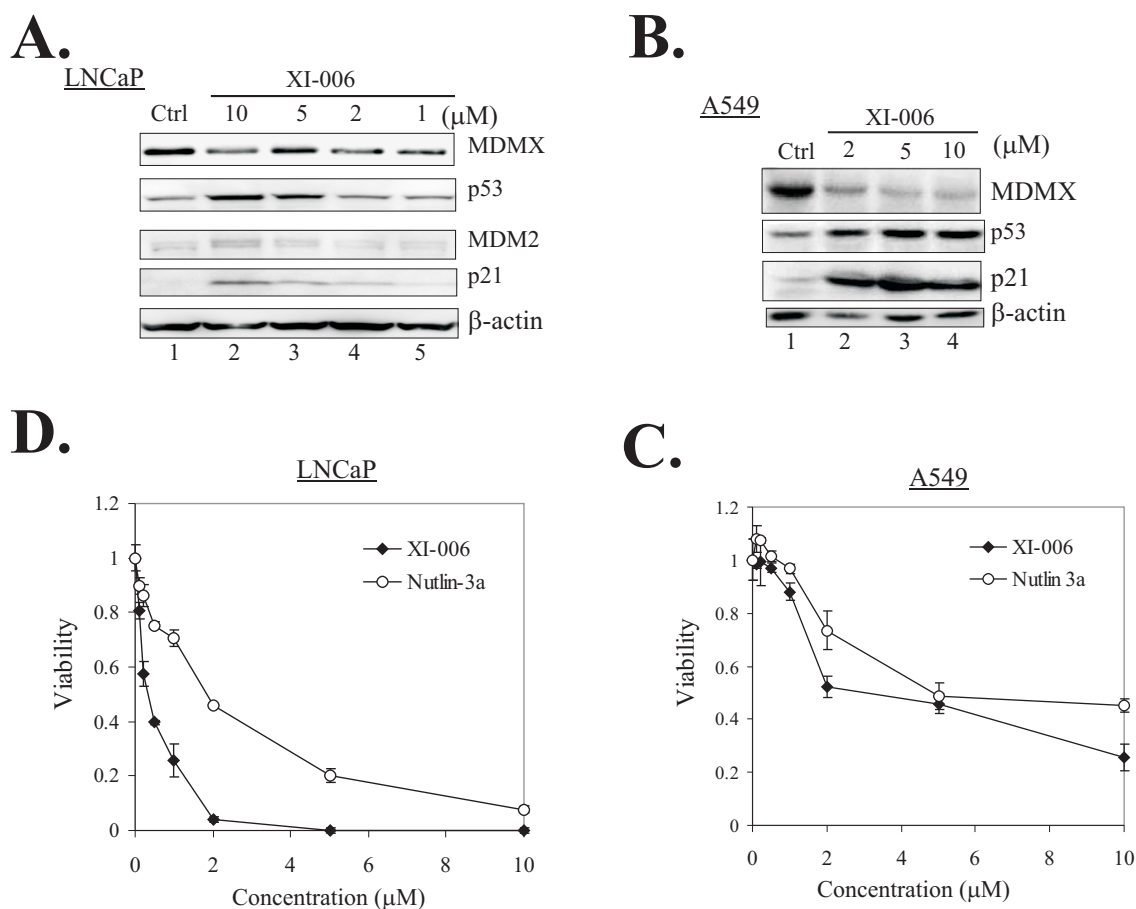

**Fig S2. XI-006 activates p53 and induces death of LNCaP and A549.** **A & B**, LNCaP (**A**) or A549 (**B**) cells were treated with XI-006 for 24 h as indicated, and subjected to immunoblotting. **C & D**, LNCaP (**C**) or A549 (**D**) cells were treated with XI-006 for 4 days and subjected to MTT assays to measure cell viability.

**Fig S3**

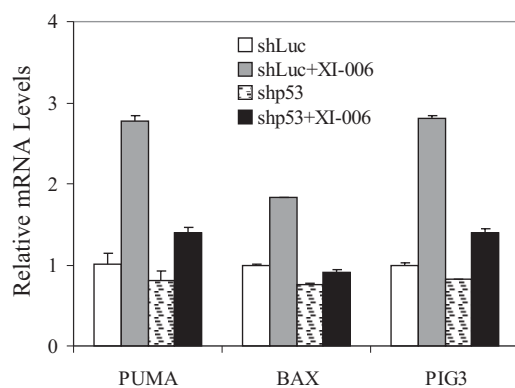

**Fig S3. Knockdown of p53 expression impairs proapoptotic gene expression induced by XI-006**  
MCF-7 cells infected with Lentiviruses expressing a p53-specific shRNA (shp53) or shLuc were treated with 2  $\mu$ M of XI-006 overnight and lysed for qRT-PCR assays to measure the mRNA levels of the indicated pro-apoptotic genes.

## Fig S4

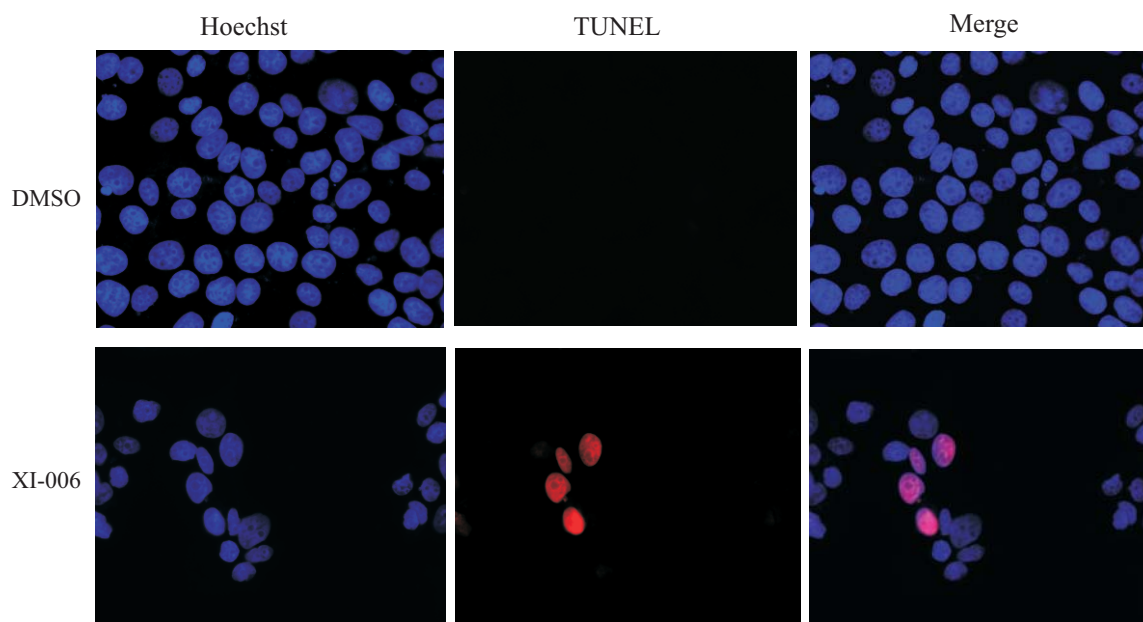

**Fig S4. XI-006 induces apoptosis.** MCF-7 cells treated with 10  $\mu$ M of XI-006 or DMSO for 48 h were fixed in 4% paraformaldehyde, and then incubated with TMR Red-labeled dUTP in the presence of terminal deoxynucleotidyl transferase.

## Fig S5

**A.**

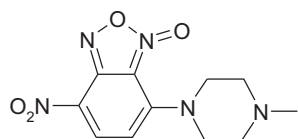

XI-006

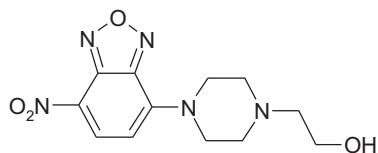

3268

**B.**

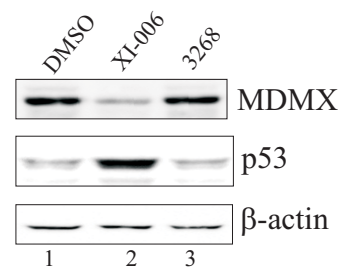

**Fig S5. An XI-006 analog incapable of inhibiting *MDMX* expression is devoid of p53-activating activity.** **A**, Structures of XI-006 and the analog. **B**, MCF-7 cells were treated with 5  $\mu$ M of XI-006 or compound 3268 for 24 h, and subjected to immunoblotting assays.

**Fig S6**

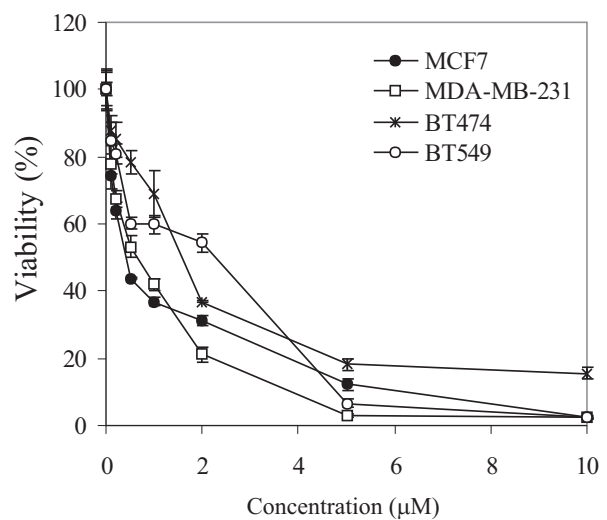

**Fig S6. XI-006 decreases the viability of p53-mutated breast cancer cells.** The indicated breast cancer cells were treated with XI-006 for 3 days followed by MTT assays to measure cell viability.

## Fig S7

**A.**

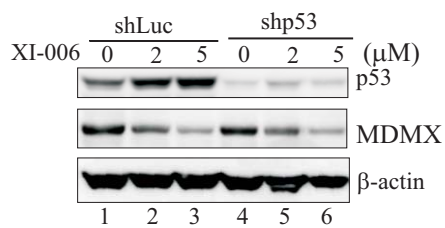

**B.**

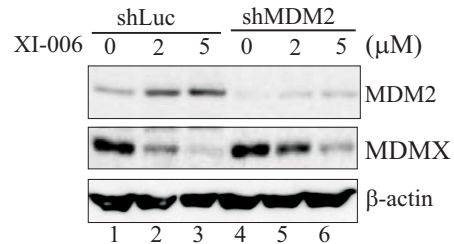

**Fig S7. Inhibition of MDMX expression by XI-006 is not a consequence of p53 *trans*-activation or MDM2 induction.** MCF-7 cells infected with shLuc, shp53 (A), or shMDM2 (B) were treated with the indicated amounts of XI-006 for 24 h, and lysed for immunoblotting assays.
